# Supplementary material for: Profiler: an open web platform for multi-omics analysis
Source: Research Square preprint supplement (doi:10.21203/rs.3.rs-7058776/v1), 2025-07-22
Supplement: Supplementary file 1 [file 422433599fe71b9201a90268.docx]

**Profiler: A Next-Generation Platform for Streamlined Omics Data Analysis**

**Yanis Zirem1, Léa Ledoux1, Isabelle Fournier1,2, Michel Salzet1,2**

1Univ. Lille, Inserm, CHU Lille, U1192 - Protéomique Réponse Inflammatoire Spectrométrie de Masse – PRISM, F-59000 Lille, France

2Institut Universitaire de France (IUF), Paris, France

**
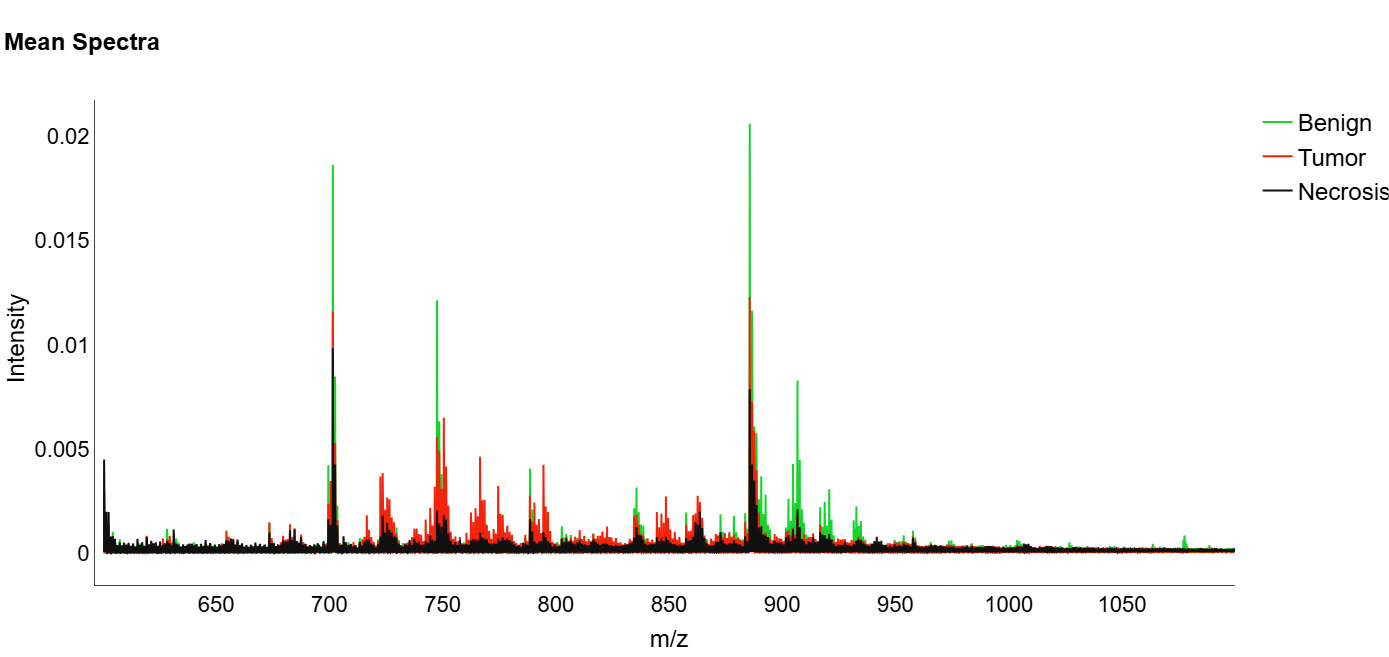
**


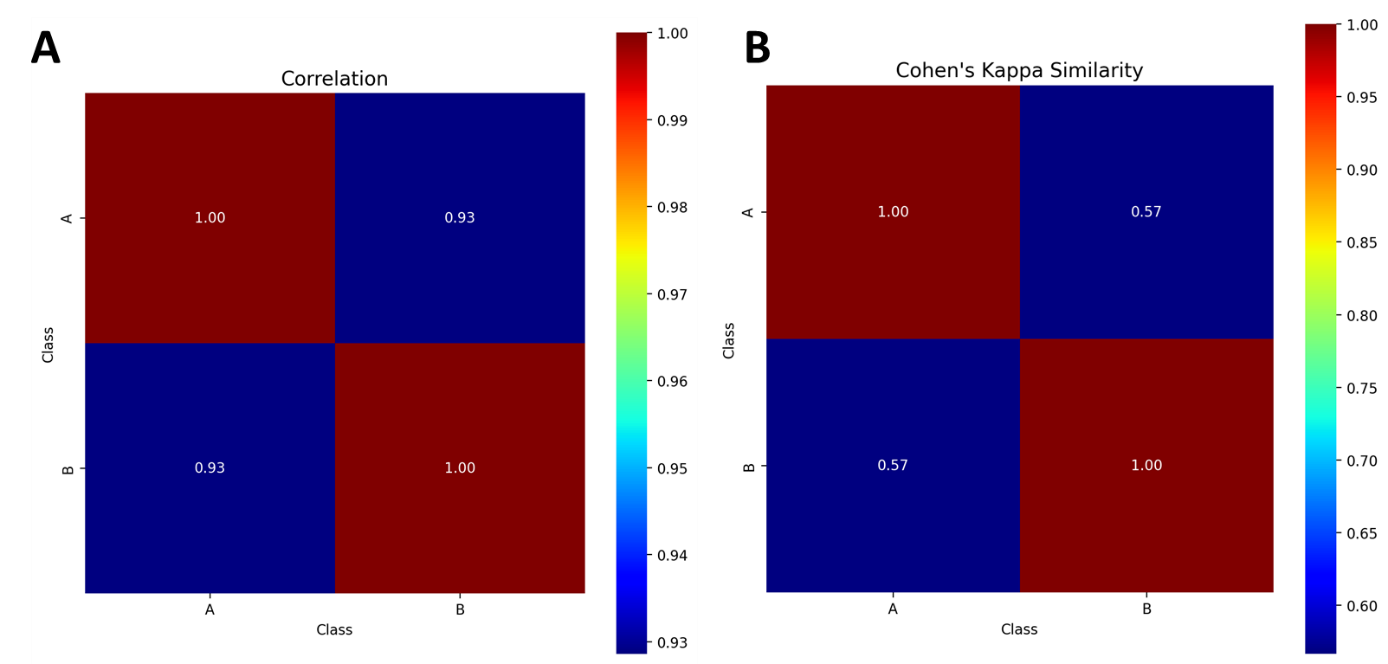
**Figure S1.** Display of a mean mass spectrum acquired using a conventional mass spectrometer (from Waters), showing intensity profiles across *m/z* for three tissue types: benign, tumor, and necrotic.

**Figure S2.** **Results using the correlation and similarity module of Profiler**. **A)** Spearman correlation matrix and **B)** Cohen’s kappa Similarity matrix with 6 discretization levels.


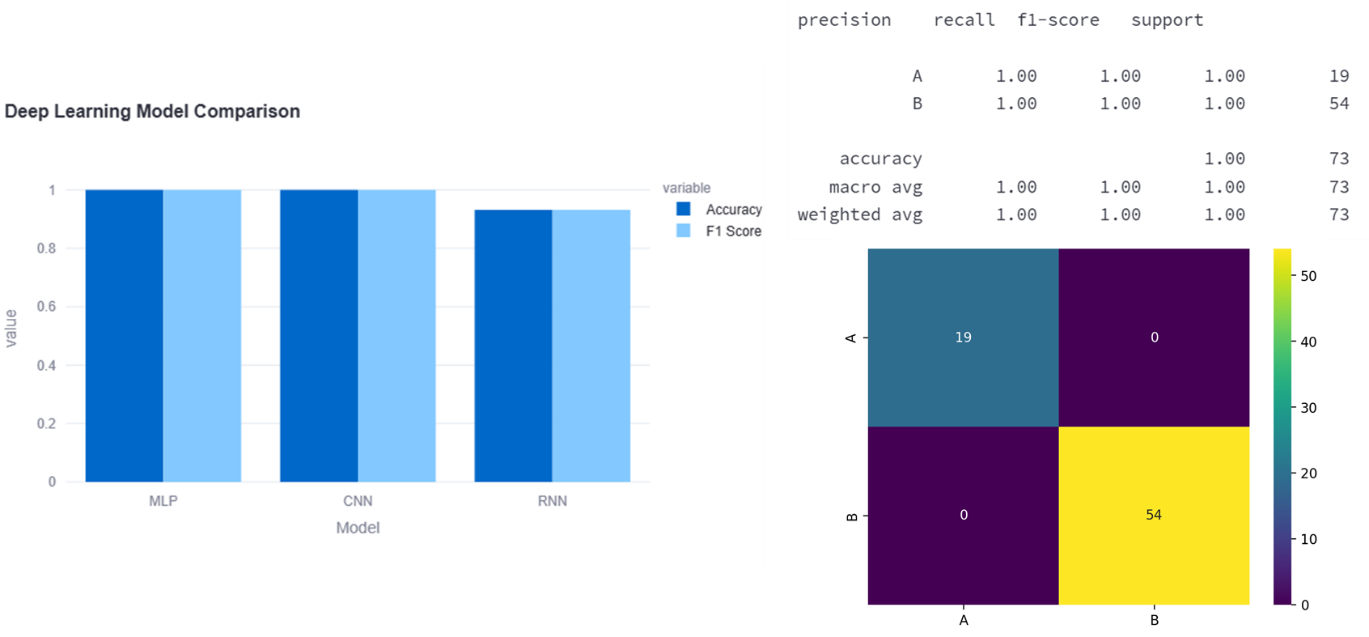
**Figure S3.** Deep Learning results where three model accuracies are compared, classification metrics and the confusion matrix for the best-performing model is detailed


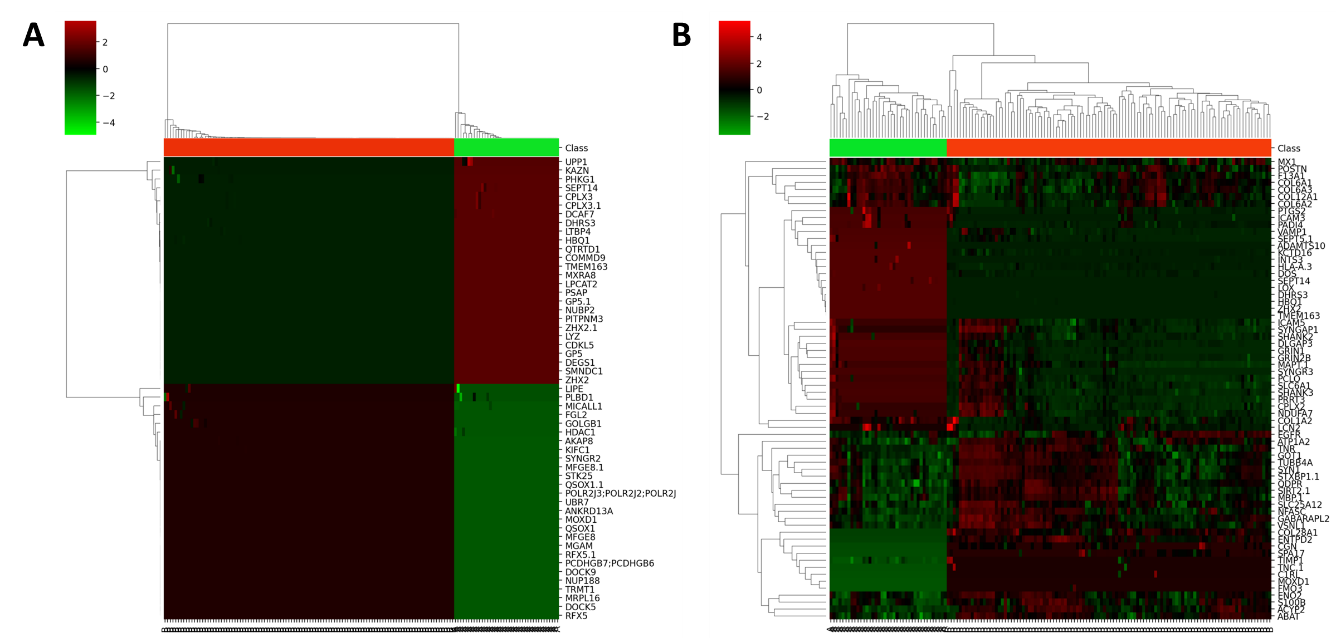


**Figure S4**. Heatmap made with a p-value of 0.01 based on **A)** volcano plot biomarkers or **B)** AI explainaibility biomarkers.


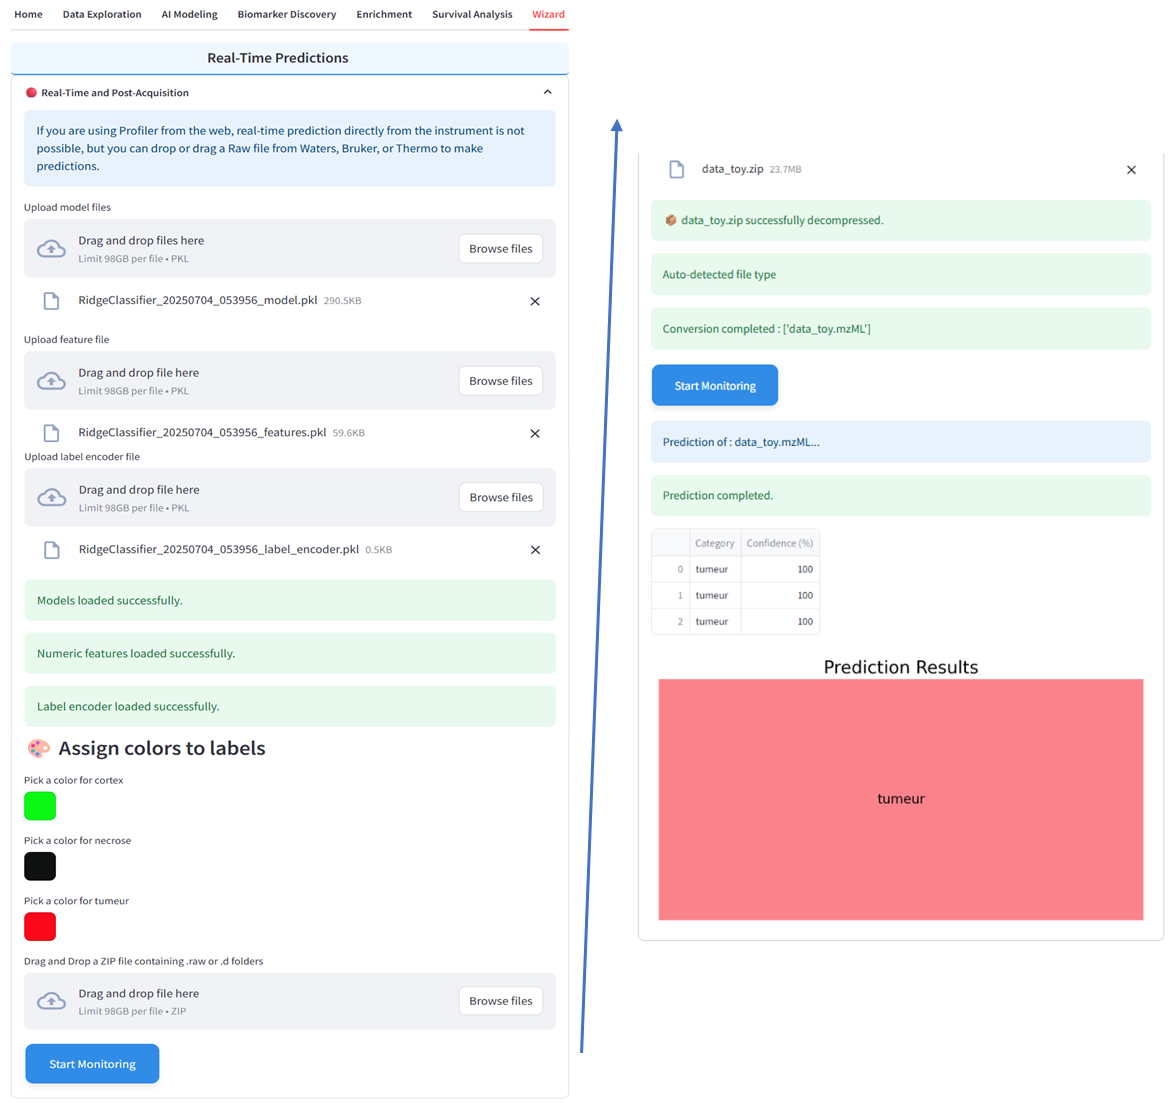
**
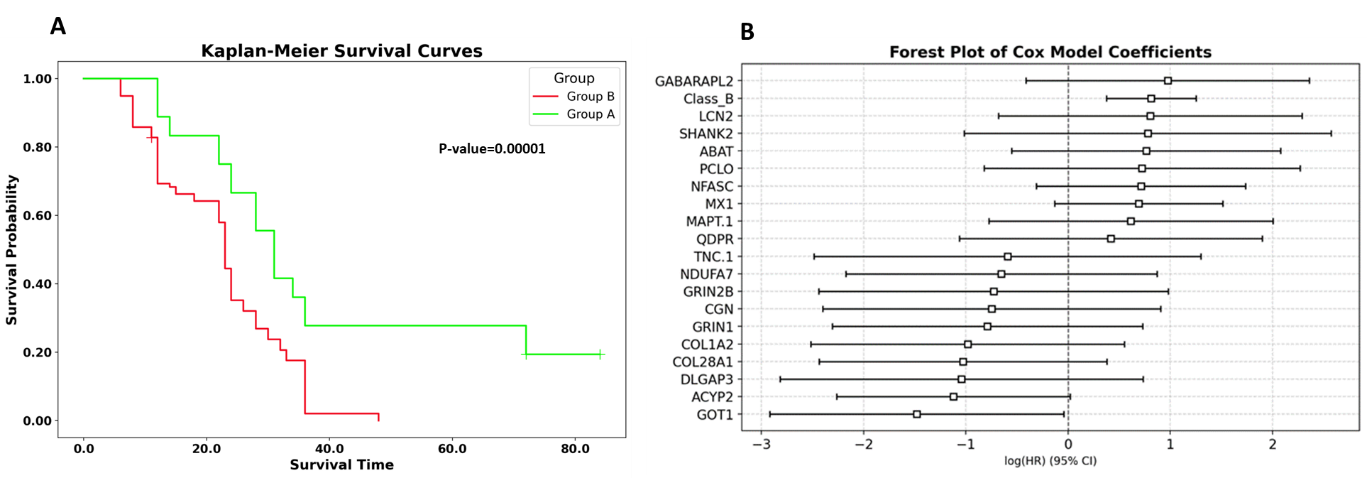
Figure S5**. **A)** Survival curves (Kaplan Meier analysis) of all 50 patients according to the two groups. **B)** Forest plot of Cox model coefficients made with top 20 contributing biomarkers to the survival outcome.

**Figure S6**. Blind results using the Wizard module of Profiler, especially the real-time and post-acquisition one.

**
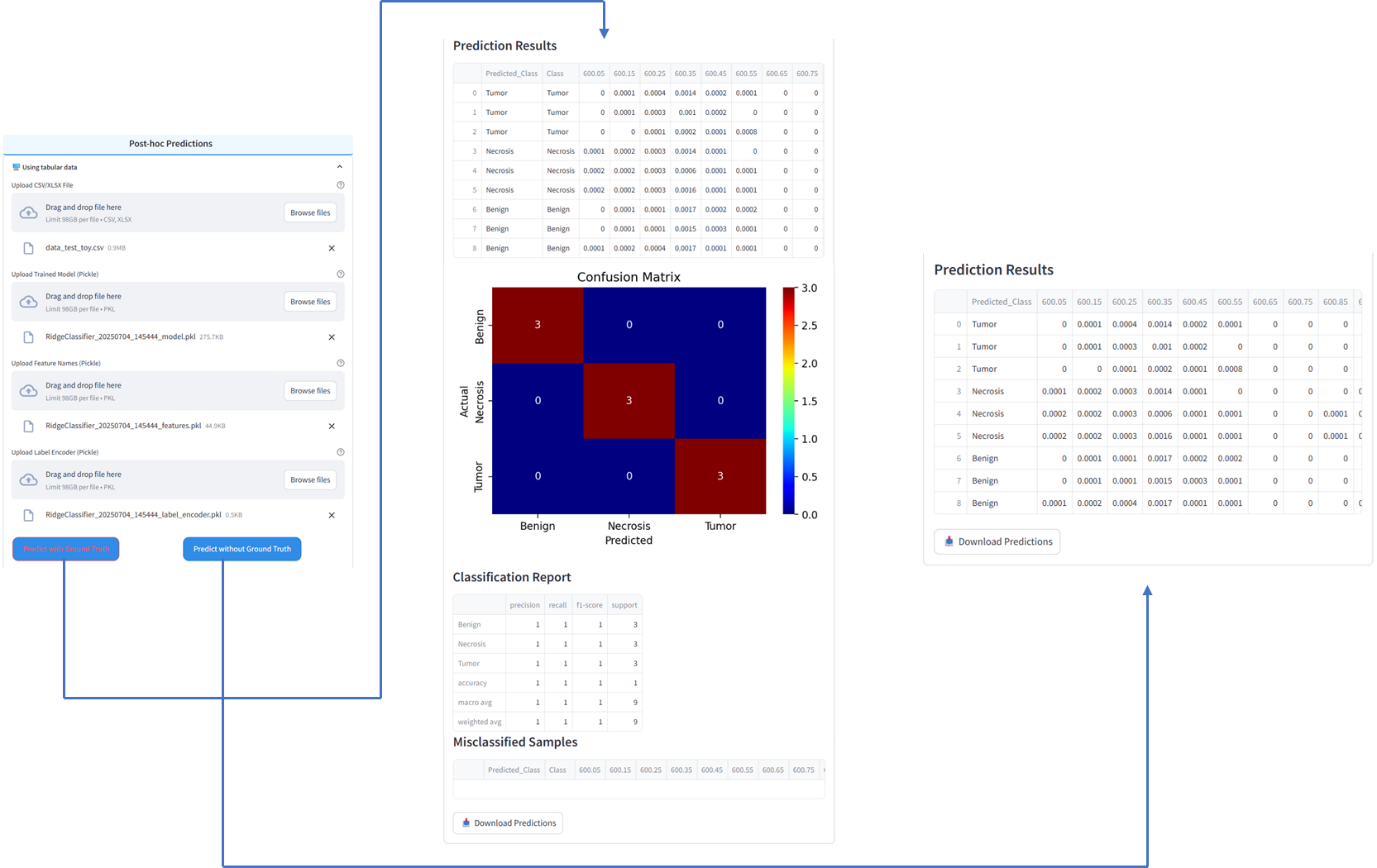
Figure S7**. Blind results using the Wizard module of Profiler, especially post-hoc one.
